# Supplementary material
Source: publisher figshare collection journal article supplement (https://frontiersin.figshare.com/ndownloader/files/17498633)
Supplement: Supplementary file [file 17498633]

## SUPPLEMENTARY FILE

### Standardization of Sequencing Coverage Depth in NGS: Recommendation for Detection of Clonal and Subclonal Mutations in Cancer Diagnostics

Petrackova Anna, Vasinek Michal, Sedlarikova Lenka, Dyskova Tereza, Schneiderova Petra, Novosad Tomas, Papajik Tomas, Kriegova Eva

#### Introduction

The OLGEN Coverage Limit software provides an easy way how to estimate the minimal depth of sequencing coverage for given variant allele frequency ( $v_f$ ), sequencing error ( $p_e$ ) and limits for cumulative probability of  $S_E$  or more errors ( $p_{fp}$ ) resp.  $\hat{v}_f$  or more reads supporting variant allele ( $p_{tp}$ ) (Figure S1, Table S1).

The computational model assumes that errors are accumulated in one variant allele only, either yielding a detection of false positive variant allele or suppressing detection of variant allele (false negative).

To estimate the minimal required depth of coverage, the software searches for a minimal value in which the cumulative distribution function (cdf) of binomial distribution meets limiting conditions.

**OLGEN**  
**Coverage Limit Calculator**

Variant allele frequency (%)

5.0 ?

Sequencing error rate (%)

1.0 ?

Probability of false positive result (%)

0.1 ?

Probability of true positive result (%)

99.9 ?

Minimum of variant reads (optional)

? ?

[Calculate coverage](#)

**Recommended coverage: 562**

**Minimum of variant reads: 14**

Figure S1: Screen from OLGEN Coverage Limit online application - representative example.

| Field                                    | Description/Hint                                                                                                                                                                                                                  |
|------------------------------------------|-----------------------------------------------------------------------------------------------------------------------------------------------------------------------------------------------------------------------------------|
| Variant allele frequency (%)             | Intended limit of detection of the NGS assay. Expressed as a percentage of sequence reads carrying a mutant allele.                                                                                                               |
| Sequencing error rate (%)                | Intrinsic NGS error rate (usually 0.1-1.0% = phred quality score of 20-30). Must not exceed variant allele frequency. Considering also the assay-specific error, use the sum of assay-specific error and sequence error as input. |
| Probability of false positive result (%) | Given the sequencing coverage depth, this parameter determines the largest number of false variant reads within a limit given by cumulative probability of a false positive result based on the sequencing error rate.            |
| Probability of true positive result (%)  | Given the sequencing coverage depth, this parameter determines the smallest number of true variant reads within a limit given by cumulative probability of a true positive result based on the intended variant allele frequency. |
| Minimum variant reads (optional)         | Minimum number of sequencing reads supporting variant.                                                                                                                                                                            |

Table S1: Description of OLGEn Coverage Limit parameters.

## Statistical Model of Minimal Sequencing Coverage

We assume that function  $\text{binom}(N, p, k)$  returns probability of obtaining exactly  $k$  positive instances from  $N$  trials with probability of success  $p$ . Function  $\text{cdfbinom}(N, p, k)$  returns cumulative probability of obtaining up to  $k$  positive instances from  $N$  trials with probability of success  $p$ .

### Sequencing Error

We assume the sequencing error  $p_e$  is distributed binomially. Thus, a probability density function can be plotted for given sequencing error  $p_e$  and the number of reads  $N$ . An example of probability density function for  $p_e = 0.01$  and  $N = 200$  is demonstrated in Figure S2. In this example, sequencing errors  $SE = 2$  are obtained with the highest probability. This corresponds to the expected value  $E[SE] = p_e N = 2$ .

Next, we search for the number of sequencing errors  $SE$  so that the probability obtained for at most  $SE$  errors is at least  $p_{fp}$ , i.e.  $p(X \leq SE) \geq p_{fp}$ . An example of this case is shown in Figure S3 for  $p_e = 0.01$ ,  $N = 200$  and  $p_{fp} = 0.01$ . In this case, the limiting number of sequencing errors is  $SE = 6$  reads.

### Variant Allele Reads

We assume the variant allele is distributed binomially. If the true frequency of variant allele is  $v_f$  and the measured frequency is  $\hat{v}_f$  then the probability that we observe  $\hat{V}_f$  variant allele reads is given by  $p(X = \hat{V}_f) = \text{binom}(N, v_f, \hat{V}_f)$ . Here we used capital letters to distinguish absolute number of variant allele reads from the relative number of variant allele reads. The cumulative probability is  $p(X \geq \hat{V}_f) = 1 - \text{cdfbinom}(N, v_f, \hat{V}_f - 1)$ .

In Figure S4 there are three distributions for three different variant allele frequencies visualized. Vertical lines denote the limit where the cumulative probability  $P(X \geq \hat{V}_f) \geq 0.99$ .

Taken together, there are three conditions that must apply simultaneously in order to calculate minimal coverage and a minimal number of variant reads to ensure required probability of variant detection:

- $\hat{V}_f > SE$
- $p(X > E) = 1 - \text{cdfbinom}(N, v_f, E) \leq p_{fp}$
- $p(X \geq \hat{V}_f) = \text{cdfbinom}(N, v_f, \hat{V}_f) \geq p_{tp}$

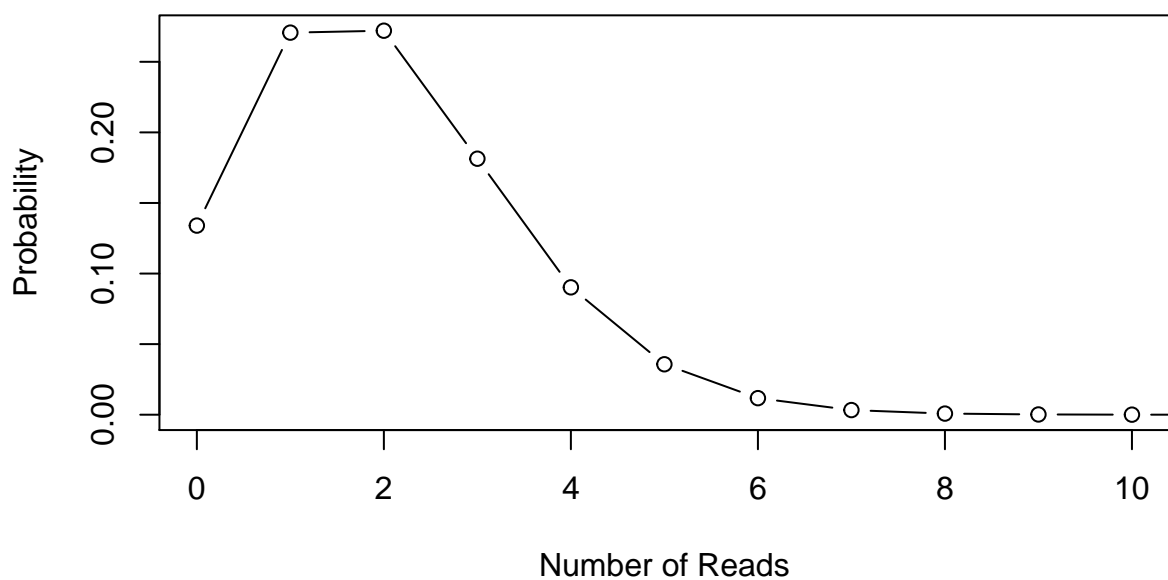

Figure S2: Distribution of sequencing errors for  $p_e = 0.01$  and number of reads  $N = 200$ .

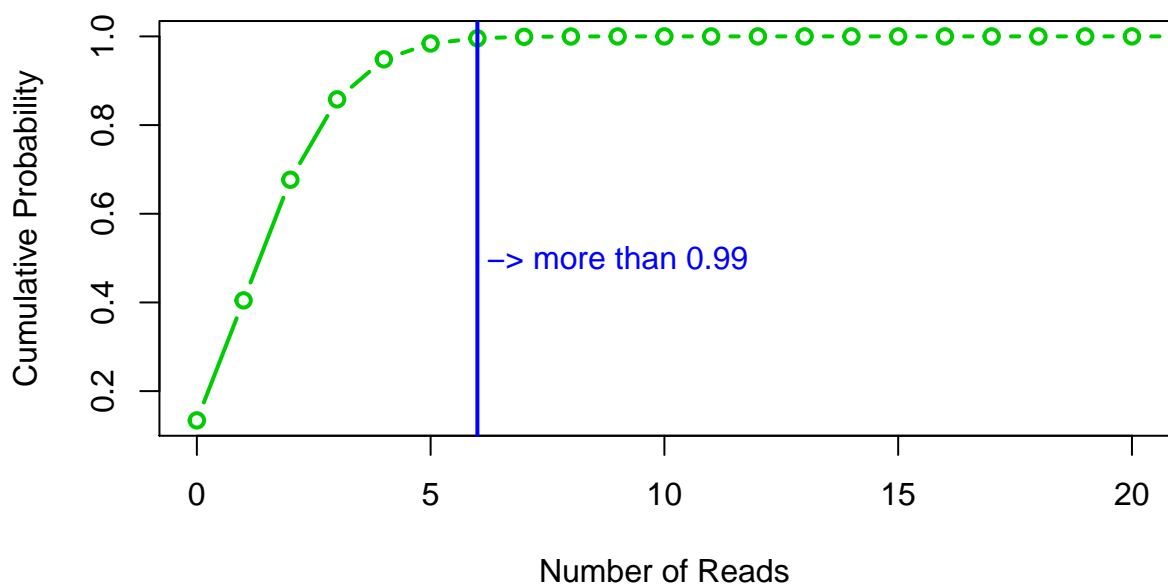

Figure S3: Cumulative distribution of sequencing errors for  $p_e = 0.01$ , with a vertical line denoting limit for which any greater or equal number of sequencing errors have cumulative probability greater than 0.99.

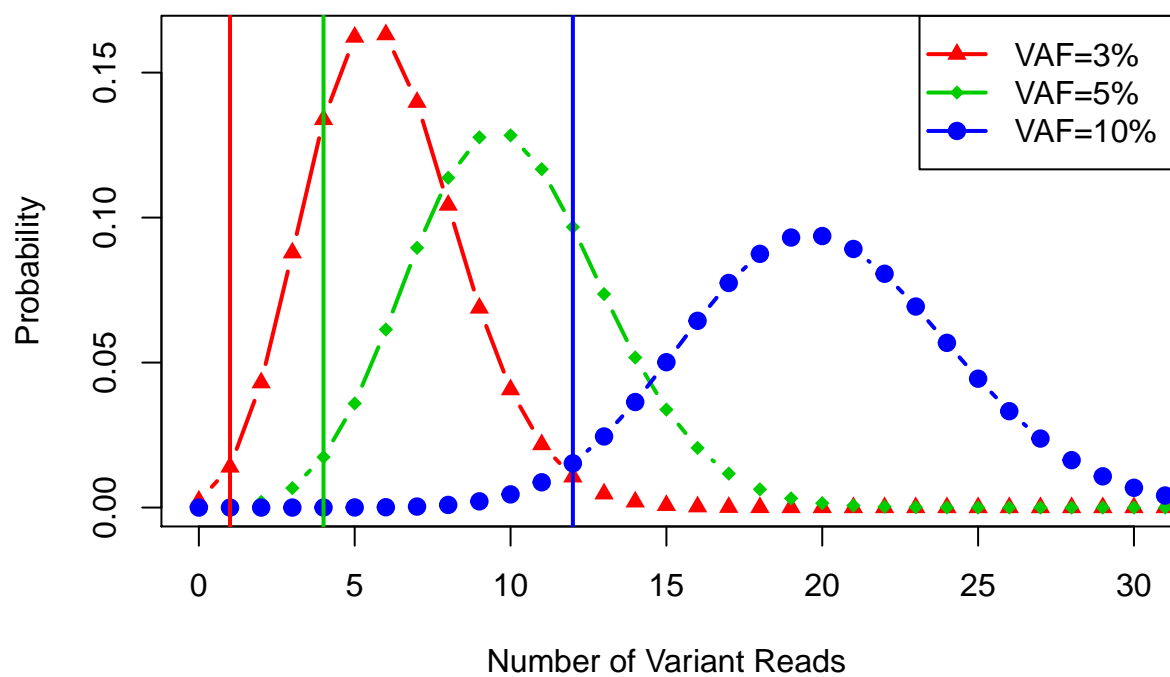

Figure S4: Binomial distribution of variant allele reads for three different variant allele frequencies, with a vertical line denoting limit for which any higher number of sequencing errors have cumulative probability greater than 0.99. VAF = variant allele frequency.

The iterative algorithm implementing aforementioned conditions is presented in the next section using R programming language.

## Example R Script

- Variant allele frequency:  $v_f = 0.1$ .
- Sequencing error:  $p_e = 0.01$ .
- Limit of cumulative probability for sequencing errors:  $p_{fp} = 0.001$ .
- Limit of cumulative probability for variant reads:  $p_{tp} = 0.999$ .

```
coverage.relax <- function(vaf,e,pfp,ptp,minvar=1,max_iterations=1000){
  coverage = 0
  vf = 0

  cov_aux = 5

  while(cov_aux < max_iterations){
    k = seq(0,cov_aux,by=1)
    e_binom = pbinom(k, cov_aux, e)

    se = 0
    for(e_id in 1:cov_aux){
      if(1 - e_binom[e_id] >= pfp){
        se = se + 1
      }
      else{
        break
      }
    }

    vf_binom = pbinom(k, cov_aux, vaf)
    if(se == 0){
      se = se + 1
    }

    if(1 - vf_binom[se] >= ptp && minvar <= se){
      vf = se
      coverage = cov_aux
      break
    }

    cov_aux = cov_aux + 1
  }
  c(coverage,vf)
}
```

```
## [1] "Minimum sequencing coverage depth and variant allele frequency"
```

```
coverage.relax(vaf=0.1,e=0.01,pfp=0.001,ptp=0.999)
```

```
## [1] 175    7
```

```
## [1] "Minimum sequencing coverage depth and variant allele frequency"
```

```
coverage.relax(vaf=0.1,e=0.01,pfp=0.001,ptp=0.999,minvar=10)
```

```
## [1] 300 10
```

## Links

**The OLGEN Coverage Limit Calculator can be accessed:**

- Source codes - including python, R scripts and link to online application are available at:  
<https://github.com/mvasinek/olgen-coverage-limit>
